# Supplementary material for: Association of Blood Pressure Within 6 h After Endovascular Thrombectomy and Functional Outcomes in Ischemic Stroke Patients With Successful Recanalization
Source: Front Neurol. 2022 Apr 14;13:860124. doi: 10.3389/fneur.2022.860124 (PMC9046679; doi:10.3389/fneur.2022.860124)
Supplement: Supplementary file 1 [file Table_1.XLSX]

## Sheet: Sheet1
Table S1 Adjusted odds ratios of BP parameters shown per 10mmHg increase in SBP
		Model 1		Model 2
		p value	OR(95% CI)	p value	OR(95% CI)
Baseline BP level
FPO SBP		0.034	1.16(1.01-1.33)	0.593	1.04(0.9-1.21)
Postoperative BP level
Mean SBP	A	0.069	1.26(0.98-1.61)	0.736	1.05(0.79-1.39)
Minimum SBP	A	0.015	1.41(1.07-1.87)	0.31	1.17(0.87-1.58)
BP management quality median (mean)
Time under 120mmHg	A	0.328	0.93(0.79-1.08)	0.533	1.06(0.89-1.26)
Time under 140mmHg	A	0.067	0.82(0.67-1.01)	0.807	0.97(0.78-1.22)
Maximum BP	A	0.033	1.18(1.01-1.36)	0.952	1(0.85-1.17)
Model 1:Adjusted for gender, fasting blood glucose and NIHSS; Model 2:Adjusted for age and ASPECT;OR: Odds ratios; BP:blood pressure; FPO SBP:the first postoperative SBP; SBP:systolic blood pressure;A: the first 6 hours
