# Supplementary material for: Association of Blood Pressure Within 6 h After Endovascular Thrombectomy and Functional Outcomes in Ischemic Stroke Patients With Successful Recanalization
Source: Front Neurol. 2022 Apr 14;13:860124. doi: 10.3389/fneur.2022.860124 (PMC9046679; doi:10.3389/fneur.2022.860124)
Supplement: Supplementary file 2 [file Table_2.xlsx]

## Sheet: Sheet1
Table S2. p-values when explore the association between BP parameters and functional outcomes (mRS 0-2 versus 3-6) in patients in different subgroups
		Total	admission SBP		ICA occlusion		OTP<6h	Cardiac dysfunction
			<140	≥140	Yes	No		Yes	No
Number		163	66	92	61	114	146	44	119
Baseline BP level
FPO SBP (median(IQR))		0.006	0.437	0.009	0.002	0.06	0.004	0.981	0.001
Postoperative BP level
Mean SBP	A	0.023	0.211	0.109	0.043	0.108	0.03	0.524	0.02
	B	0.212	0.019	0.694	0.245	0.348	0.287	0.108	0.531
	C	0.685	0.127	0.262	0.514	0.294	0.687	0.172	0.744
	D	0.253	0.131	0.876	0.799	0.177	0.166	0.459	0.366
Minimum SBP	A	0.011	0.111	0.129	0.054	0.044	0.009	0.31	0.019
	B	0.626	0.076	0.315	0.945	0.546	0.734	0.366	0.968
	C	0.888	0.103	0.095	0.363	0.496	0.789	0.473	0.588
	D	0.402	0.372	0.873	0.866	0.311	0.37	0.188	0.833
BP reduction degree
FPO SBP- Mean	A	0.055	0.995	0.039	0.051	0.252	0.034	0.74	0.016
	B	0.059	0.626	0.015	0.022	0.263	0.033	0.596	0.008
	C	0.02	0.847	0.005	0.004	0.357	0.014	0.592	0.001
	D	0.05	0.883	0.016	0.007	0.321	0.052	0.809	0.01
FPO SBP-Minimum SBP	A	0.136	0.862	0.045	0.043	0.302	0.057	0.673	0.014
	B	0.028	0.878	0.006	0.007	0.178	0.014	0.769	0.002
	C	0.011	0.739	0.003	0.002	0.223	0.006	0.824	0.002
	D	0.026	0.822	0.012	0.008	0.257	0.021	0.575	0.001
(FPO SBP - Mean SBP)/FPO SBP	A	0.041	0.783	0.015	0.02	0.279	0.037	0.511	0.007
	B	0.064	0.369	0.013	0.045	0.318	0.037	0.384	0.005
	C	0.017	0.651	0.004	0.002	0.429	0.012	0.438	0.001
	D	0.045	0.57	0.012	0.006	0.464	0.047	0.609	0.005
(FPO SBP-Minimum SBP)/FPO SBP	A	0.155	0.786	0.046	0.045	0.415	0.131	0.478	0.021
	B	0.032	0.512	0.006	0.007	0.23	0.017	0.517	0.002
	C	0.011	0.6	0.002	0.001	0.314	0.006	0.654	0.001
	D	0.03	0.851	0.012	0.009	0.398	0.023	0.359	0.001
Velocity of BP reduction
Time from FPO SBP to the minimum SBP A (h)		0.104	0.826	0.066	0.019	0.423	0.152	0.451	0.023
BP management quality
Time under 120mmHg	A	0.119	0.241	0.676	0.119	0.219	0.064	0.383	0.192
	B	0.43	0.153	0.383	0.434	0.566	0.592	0.385	0.681
	C	0.628	0.245	0.46	0.557	0.621	0.529	0.822	0.637
	D	0.29	0.162	0.85	0.633	0.35	0.266	0.476	0.343
Time under 140mmHg	A	0.025	0.268	0.076	0.035	0.175	0.032	0.808	0.008
	B	0.564	0.118	0.499	0.262	0.882	0.549	0.543	0.692
	C	0.805	0.497	0.728	0.64	0.49	0.677	0.964	0.994
	D	0.548	0.739	0.693	0.878	0.394	0.444	0.872	0.703
Maximum SBP	A	0.005	0.411	0.002	0.033	0.029	0.007	0.265	0.008
	B	0.099	0.131	0.554	0.118	0.337	0.162	0.234	0.209
	C	0.144	0.047	0.96	0.402	0.185	0.079	0.048	0.55
	D	0.046	0.078	0.516	0.445	0.065	0.036	0.372	0.077
SBP: systolic blood pressure;ICA:internal carotid artery involved;OTP: time from onset to puncture; FPO SBP,the first postoperative SBP;h, hours;A,0-6 hours following procedural;B,7-12 hours hours following procedural;C, 13-18 hours following procedural;D, 19-24 hours following procedural.
