# Supplementary material for: Association of Blood Pressure Within 6 h After Endovascular Thrombectomy and Functional Outcomes in Ischemic Stroke Patients With Successful Recanalization
Source: Front Neurol. 2022 Apr 14;13:860124. doi: 10.3389/fneur.2022.860124 (PMC9046679; doi:10.3389/fneur.2022.860124)
Supplement: Supplementary file 3 [file Table_3.XLSX]

## Sheet: Sheet1
Table S3 Associations between FPO SBP BP (dichotomized at 113mmHg) and other BP parameters
		FPO SBP		p
		≤136mmHg	>136mmHg
n		89	74
Admission SBP(mean±SD)		137±24	156±25	<0.001
Postoperative BP level
Mean SBP (mean±SD)	A	120±12	137±10	<0.001
	B	119±15	123±12	0.094
	C	119±14	124±13	0.017
	D	120±14	128±16	<0.001
Minimum SBP (median(IQR))	A	103(98-112)	116(109-123)	<0.001
	B	109(101-123)	116(102-124)	0.172
	C	109(100-117)	115(104-124)	0.03
	D	109(102-118)	120(111-130)	<0.001
BP reduction degree
FPO SBP - Mean SBP (median(IQR))	A	-6(-15-2)	21(10-32)	<0.001
	B	-3(-15-7)	33(22-51)	<0.001
	C	-7(-16-7)	33(20-47)	<0.001
	D	-8(-18-7)	29(16-42)	<0.001
FPO SBP-Minimum SBP (median(IQR))	A	3(0-14)	39(26-61)	<0.001
	B	2(-9-16)	43(28-58)	<0.001
	C	4(-8-17)	46(29-60)	<0.001
	D	3(-7-16)	39(23-54)	<0.001
(FPO SBP - Mean SBP)/FPO SBP (mean±SD)	A	-0.07±0.12	0.13±0.09	<0.001
	B	-0.07±0.17	0.22±0.11	<0.001
	C	-0.06±0.16	0.21±0.12	<0.001
	D	-0.07±0.16	0.19±0.13	<0.001
(FPO SBP-Minimum SBP)/FPO SBP；（mean±SD)	A	0.07±0.08	0.27±0.13	<0.001
	B	0.01±0.16	0.28±0.12	<0.001
	C	0.02±0.15	0.28±0.12	<0.001
	D	0.03±0.17	0.26±0.15	<0.001
Velocity of BP reduction (median(IQR))
Time from FPO SBP to the minimum SBP A (h)		1.5(0.5-4)	3.5(2.5-5)	<0.001
BP management quality median (mean)
Time under 120mmHg(h)	A	3.5(3.37)	1(1.49)	<0.001
	B	4(3.4)	2.75(2.76)	0.102
	C	4(4.28)	2.5(2.77)	0.017
	D	4(3.49)	1(2.05)	<0.001
Time under 140mmHg(h)	A	6(5.23)	4(3.86)	<0.001
	B	6(5.44)	6(5.2)	0.179
	C	6(5.49)	6(5.27)	0.213
	D	6(5.45)	6(4.79)	0.01
Maximum SBP (median(IQR))	A	103(98-112)	116(109-123)	<0.001
	B	109(101-123)	116(102-124)	0.172
	C	109(100-117)	115(104-124)	0.03
	D	109(102-118)	120(111-130)	<0.001
BP, blood pressure;SBP, systolic blood pressure;SD, standard deviation; FPO SBP,the first postoperative SBP;h, hours;A,0-6 hours following procedural;B, 7-12 hours hours following procedural;C, 13-18 hours following procedural;D, 19-24 hours following procedural.
