# Supplementary material for: Association of Blood Pressure Within 6 h After Endovascular Thrombectomy and Functional Outcomes in Ischemic Stroke Patients With Successful Recanalization
Source: Front Neurol. 2022 Apr 14;13:860124. doi: 10.3389/fneur.2022.860124 (PMC9046679; doi:10.3389/fneur.2022.860124)
Supplement: Supplementary file 4 [file Table_4.XLSX]

## Sheet: Sheet1
Table S4. Baseline characteristics of study population compared between patients with and without intracerebral hemorrhage
	Intracerebral hemorrhage
	No, n (%)	Yes, n (%)	p-value (unadjusted)
Number of patients	102(63)	61(37)
Patient characteristics
Age, y, median (IQR)	70(61-78)	69(56-79)	0.777
Female	1.47 (0.50)	1.43 (0.50)	0.585
ASPECTS 6-10	72 (75.8)	31 (55.4)	0.015
NIHSS score, mean±SD	15±5	16±5	0.033
Previous use of IV thrombolysis	32 (31.4)	24 (39.3)	0.386
OTP(mean (SD))	4.58 (1.16)	4.74 (1.03)	0.386
Postoperative hypotension	6 (5.9)	6 (9.8)	0.532
Decompressive craniectomy	1 (1.0)	3 (5.0)	0.296
Malignant cerebral edema	9 (8.8)	14 (23.0)	0.023
Postoperative residual stenosis (moderate fo severe)	17 (17.2)	8 (13.1)	0.644
Medical history
Hypertension	49 (48.0)	31 (50.8)	0.856
Diabetes mellitus	19 (18.6)	13 (21.3)	0.831
Coronary heart disease	14 (13.7)	10 (16.4)	0.813
Cardiac dysfunction	29 (28.4)	15 (24.6)	0.725
Atrial fibrillation	49 (48.0)	26 (42.6)	0.611
Laboratory index
Fasting blood glucose, median (IQR)	6.95 (6.11- 8.68)	7.61 (6.85- 9.54)	0.026
LDL, median (IQR)	2.38 (1.79- 2.90)	2.54 (2.19- 3.06)	0.077
PT, median (IQR)	11.70 (10.90- 12.53)	11.40 (10.80- 12.20)	0.294
INR, median (IQR)	1.02 (0.96- 1.10)	1.01 (0.97- 1.07)	0.552
Occluded segment
ICA	74 (72.5)	40 (65.6)	0.445
M1	49 (48.0)	22 (36.1)	0.184
M2	21 (20.6)	15 (24.6)	0.688
Other *	5 (4.9)	4 (6.6)	0.926
IQR, interquartile range; ASPECT, Alberta Stroke Program Early CT score; NIHSS, National Institute of Health Stroke Scale; SD, standard deviation;IV. Intravenous; OTP, time from onset to puncture; ICH, intracerebral hemorrhage; PT, prothrombin time; INR, international normalized ratio; ICA, internal carotid artery; M(segment), middle cerebral artery; A(segment), anterior cerebral artery; *A1/A2/M…
