# Supplementary material for: Association of Blood Pressure Within 6 h After Endovascular Thrombectomy and Functional Outcomes in Ischemic Stroke Patients With Successful Recanalization
Source: Front Neurol. 2022 Apr 14;13:860124. doi: 10.3389/fneur.2022.860124 (PMC9046679; doi:10.3389/fneur.2022.860124)
Supplement: Supplementary file 5 [file Table_5.XLSX]

## Sheet: Sheet1
Table S5 Associations between BP parameters and intracerebral hemorrhage
		Intracerebral hemorrhage
		No, n (%)	Yes, n (%)	p-value (unadjusted)
Baseline BP level
Admission SBP(mean±SD)		146±28	144±24	0.636
FPO SBP (median(IQR))		135(113-152)	133(112-152)	0.537
Postoperative BP level
Mean SBP (mean±SD)	A	128±14	128±14	0.787
	B	121±14	121±13	0.999
	C	123±15	119±12	0.127
	D	123±15	123±16	0.9
Minimum SBP (mean±SD)	A	110±14	110±13	0.939
	B	113±14	112±13	0.777
	C	113±14	109±13	0.066
	D	114±15	113±17	0.64
BP reduction degree
FPO SBP- Mean SBP (mean±SD)	A	7±20	5±22.	0.685
	B	14±29	12±29	0.672
	C	12±28	14±29	0.76
	D	12±27	10±29	0.609
FPO SBP-Minimum SBP (mean±SD)	A	25±25	23±26	0.599
	B	22±30	21±31	0.777
	C	22±29	24±29	0.65
	D	22±31	20±29	0.646
(FPO SBP- Mean SBP)/FPO SBP (mean±SD)	A	0.03 (0.15)	0.01 (0.15)	0.59
	B	0.07 (0.21)	0.05 (0.20)	0.629
	C	0.06 (0.20)	0.07 (0.19)	0.79
	D	0.06 (0.19)	0.04 (0.20)	0.496
(FPO SBP-Minimum SBP)/FPO SBP；（mean±SD)	A	0.16 (0.14)	0.15 (0.15)	0.451
	B	0.14 (0.19)	0.12 (0.20)	0.702
	C	0.13 (0.20)	0.15 (0.18)	0.594
	D	0.13 (0.20)	0.12 (0.19)	0.67
Velocity of BP reduction
Time from FPO to the minimum SBP A (h)		3（1-5）	2（1-4.5）	0.159
BP management quality median (mean)
Time under 120mmHg(h)	A	2.4(2)	2.7(2)	0.552
	B	3.1(3)	3.2(3)	0.758
	C	3.8(3)	3.2(3)	0.514
	D	2.8(2)	2.9(2.5)	0.739
Time under 140mmHg(h)	A	4.6(5)	4.7(5.5)	0.824
	B	5.3(6)	5.3(6)	0.915
	C	5.2(6)	5.8(6)	0.009
	D	5.2(6)	5.1(6)	0.658
Maximum SBP (mean±SD)	A	151±25	153±24	0.685
	B	131±16	131±14	0.798
	C	132±17	129±12	0.305
	D	132±16	133±17	0.737
BP, blood pressure;SBP, systolic blood pressure;SD, standard deviation; FPO SBP,the first postoperative SBP;h, hours;A,0-6 hours following procedural;B, 7-12 hours hours following procedural;C, 13-18 hours following procedural;D, 19-24 hours following procedural.
